# Supplementary material for: Adsorption of Biomineralization Protein Mms6 on Magnetite (Fe3O4) Nanoparticles
Source: MDPI journal article supplement (doi:10.3390/ijms23105554), 2022-05-16
Supplement: s1 [file s1]

## Supplementary Materials

# Adsorption of biomineralization protein Mms6 on magnetite (Fe<sub>3</sub>O<sub>4</sub>) nanoparticles

Kosuke Arai<sup>1,†</sup>, Satoshi Murata<sup>1,†</sup>, Taifeng Wang<sup>2</sup>, Wataru Yoshimura<sup>1</sup>, Mayumi Oda-Tokuhisa<sup>1</sup>, Tadashi Matsunaga<sup>1,3</sup>, David Kisailus<sup>2</sup>, Atsushi Arakaki<sup>1,\*</sup>

<sup>1</sup>Division of Biotechnology and Life Science, Institute of Engineering, Tokyo University of Agriculture and Technology, 2-24-16 Naka-cho, Koganei, Tokyo 184-8588, Japan; kouok-1030.kej-332@ezweb.ne.jp (K.A.); s-murata@st.go.tuat.ac.jp (S.M.); yosh.wasabi@gmail.com (W.Y.); mayumi.tokuhisa@gmail.com (M.O.-T.); tmatsuna@cc.tuat.ac.jp (T.M.)

<sup>2</sup>Department of Materials Science and Engineering, University of California at Irvine, Irvine, CA 92697, USA; taifengw@uci.edu (T.W.); dkisailu@uci.edu (D.K.)

<sup>3</sup>Japan Agency for Marine-Earth Science and Technology (JAMSTEC), 2-15, Natsushima-cho, Yokosuka, Kanagawa 237-0061, Japan

\*Correspondence: arakakia@cc.tuat.ac.jp

†These authors contributed equally to this work.

**Table S1** List of proteins used in this study

| Protein                    | Origin                        | Size | pI  | Amino acid sequence                                                                                                                                                                                                                                                                                                                                                                                                                      |
|----------------------------|-------------------------------|------|-----|------------------------------------------------------------------------------------------------------------------------------------------------------------------------------------------------------------------------------------------------------------------------------------------------------------------------------------------------------------------------------------------------------------------------------------------|
| His-Mms6                   | <i>M. magneticum</i><br>AMB-1 | 6.9  | 6.0 | MGHHHHHHHGGTIWTGKGLGLGLGLGLGAWGP<br>LGVVGAGAVYAYMKSRDIESAQSDDEEVELRDAL<br>A                                                                                                                                                                                                                                                                                                                                                              |
| His-Mms7                   | <i>M. magneticum</i><br>AMB-1 | 6.5  | 6.8 | MGHHHHHHHAKGLGLGLGLGLGAWGPFLGAAG<br>LAGAAALYVWARRRHGTPDLSDDALLAAAGEE                                                                                                                                                                                                                                                                                                                                                                     |
| His- $\alpha$<br>synuclein | Human                         | 15.5 | 5.2 | MGHHHHHHHMDVFMKGLSKAKEGVVAAAEKTK<br>QGVAAEAGKTKEGVLYVGSKTKEGVVHGVATVA<br>EKTKEQVTNVGGAVVTGVTAVAQKTVEGAGSIA<br>AATGFVKKDQLGKNEEGAPQEGILEDMPVDPDN<br>EAYEMPSEEGYQDYEP                                                                                                                                                                                                                                                                      |
| BSA                        | Bovine Serum                  | 66.3 | 4.9 | THKSEIAHRFKDLGEEHFKGLVLIAFSQYLQQCPF<br>DEHVKLVNELTEFAKTCVADESHAGCEKSLHTLF<br>GDELCKVASLRETYGDMADCCEKQEPERNECFL<br>SHKDDSPDLPKLKPDPNTLCDEFKADEKKFWGK<br>YLYEIARRHPYFYAPELLYANKYNGVFQECCQA<br>EDKGACLLPKIETMREKVLASSARQLRCASIQK<br>FGERALKAWSVARLSQKFPKAEFVEVTKLVTDLT<br>KVHKECCHGDLLECADDRADLAKYICDNQDTIS<br>SKLKECCDKPLLEKSHCIAEVEKDAIPENLPPLTA<br>DFAEDKDVCKNYQEAKDAFLGSFLYEYSRRHPE<br>YAVSVLLRLAKEYEATLEECCA KDDPHACYSTVF<br>DKLKHLVDE |

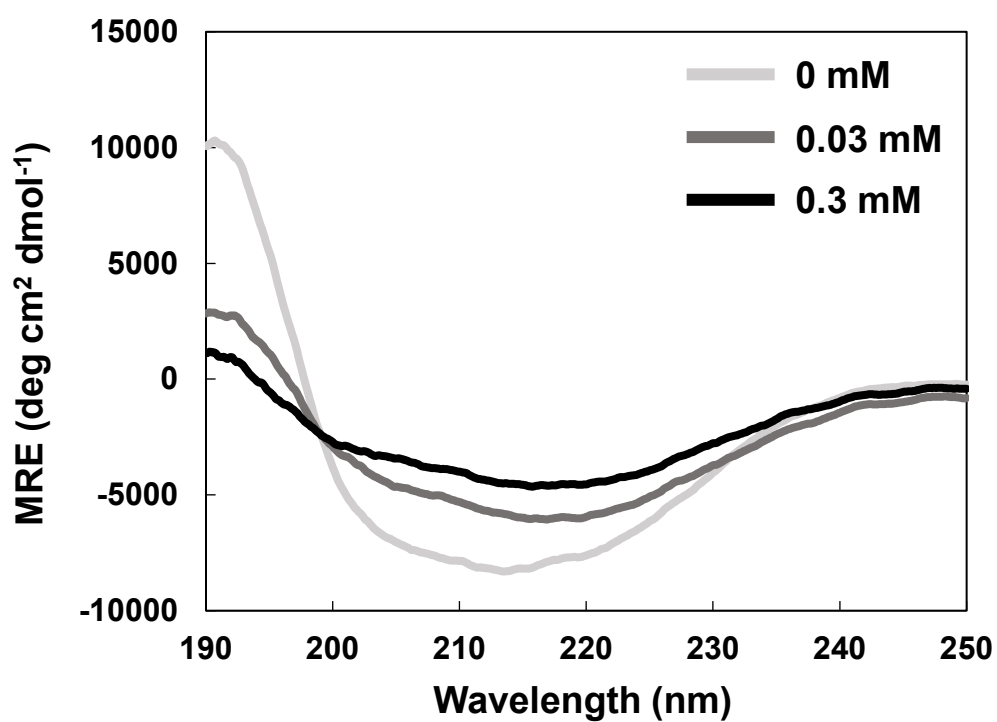

**Figure S1** CD spectra of the Mms6 in various  $\text{Fe}^{2+}$  concentration (0-0.3 mM).
